# Supplementary material
Source: publisher figshare collection journal article supplement (https://plos.figshare.com/articles/dataset/_/3912729)
Supplement: Supplementary file 1 [file 1]

Archive with 7 entries (7 files):
- S1 Appendix.PDF
- S1 Table.PDF
- S2 Table.PDF
- S3 Table.PDF
- S4 Table.PDF
- S5 Table.PDF
- S6 Table.PDF
