# Supplementary material
Source: publisher figshare collection journal article supplement (https://plos.figshare.com/articles/dataset/_/3912729)
Supplement: Supplementary file 1 [file 1 › S1 Appendix.PDF]

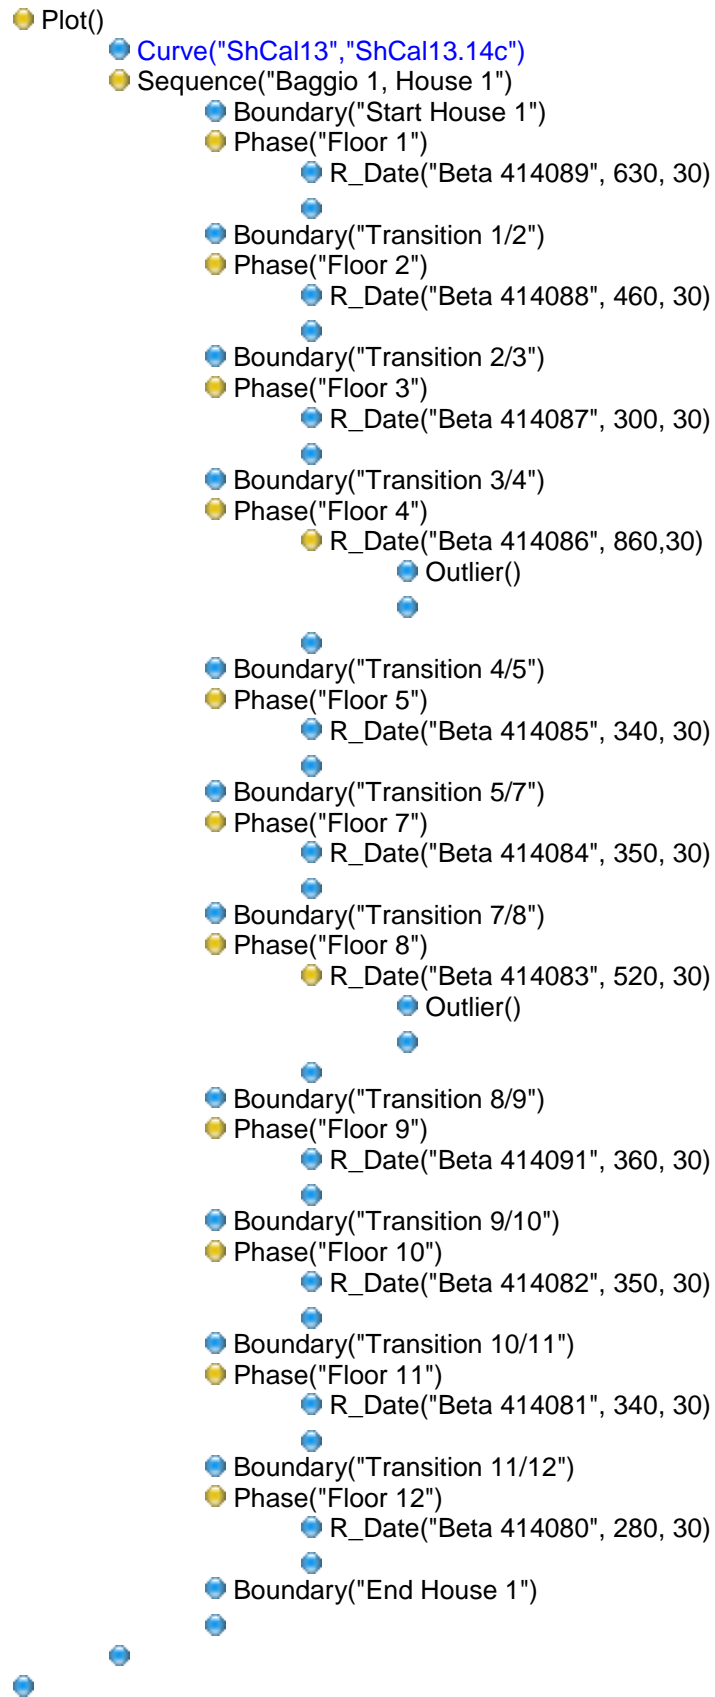

| Parameters |                  |          |           |       |         |            |             |             |
|------------|------------------|----------|-----------|-------|---------|------------|-------------|-------------|
| Parameter  | Name             | Type     | Functions | $z_i$ | $\mu_i$ | $\sigma_i$ | $l_{lim_i}$ | $u_{lim_i}$ |
| $r_1, s_1$ | intcal13         | Curve    |           |       |         |            | -48054.5    | 1965.5      |
| $r_2, s_2$ | ShCal13          | Curve    |           |       |         |            | -48054.5    | 1965.5      |
| $t_3$      | Start House 1    | Boundary |           |       | 1375.34 | 33.7207    | 860.5       | 1465.5      |
| $t_4$      | Beta 414089      | R_Date   |           |       | 1392.52 | 23.0165    | 1260.5      | 1465.5      |
| $t_5$      | Transition 1/2   | Boundary |           |       | 1423.5  | 28.9853    | 1260.5      | 1660.5      |
| $t_6$      | Beta 414088      | R_Date   |           |       | 1461.95 | 16.1542    | 1380.5      | 1660.5      |
| $t_7$      | Transition 2/3   | Boundary |           |       | 1495.23 | 22.642     | 1380.5      | 1810.5      |
| $t_8$      | Beta 414087      | R_Date   |           |       | 1518.31 | 13.8311    | 1440.5      | 1810.5      |
| $t_9$      | Transition 3/4   | Boundary |           |       | 1527.3  | 16.0437    | 1440.5      | 1810.5      |
| $t_{10}$   | Beta 414086      | R_Date   |           |       | 1226.79 | 27.8109    | 1015.5      | 1395.5      |
| $t_{11}$   | Transition 4/5   | Boundary |           |       | 1541.05 | 17.9083    | 1440.5      | 1810.5      |
| $t_{12}$   | Beta 414085      | R_Date   |           |       | 1548.06 | 18.2025    | 1440.5      | 1810.5      |
| $t_{13}$   | Transition 5/7   | Boundary |           |       | 1555.28 | 19.4999    | 1440.5      | 1810.5      |
| $t_{14}$   | Beta 414084      | R_Date   |           |       | 1562.71 | 19.9493    | 1440.5      | 1810.5      |
| $t_{15}$   | Transition 7/8   | Boundary |           |       | 1570.71 | 21.5131    | 1440.5      | 1810.5      |
| $t_{16}$   | Beta 414083      | R_Date   |           |       | 1432.76 | 13.0176    | 1300.5      | 1635.5      |
| $t_{17}$   | Transition 8/9   | Boundary |           |       | 1586.79 | 22.8537    | 1440.5      | 1810.5      |
| $t_{18}$   | Beta 414091      | R_Date   |           |       | 1594.83 | 22.5138    | 1440.5      | 1810.5      |
| $t_{19}$   | Transition 9/10  | Boundary |           |       | 1603.22 | 22.3753    | 1440.5      | 1815.5      |
| $t_{20}$   | Beta 414082      | R_Date   |           |       | 1611.59 | 21.0168    | 1440.5      | 1815.5      |
| $t_{21}$   | Transition 10/11 | Boundary |           |       | 1619.79 | 19.7278    | 1440.5      | 1815.5      |
| $t_{22}$   | Beta 414081      | R_Date   |           |       | 1628.4  | 17.2556    | 1440.5      | 1815.5      |
| $t_{23}$   | Transition 11/12 | Boundary |           |       | 1638    | 18.3416    | 1440.5      | 1965.5      |
| $t_{24}$   | Beta 414080      | R_Date   |           |       | 1648.53 | 19.1728    | 1440.5      | 1965.5      |
| $t_{25}$   | End House 1      | Boundary |           |       | 1661.8  | 28.6764    | 1440.5      | 2490.5      |

| Likelihoods                                                    |                                                                                            |               |        |
|----------------------------------------------------------------|--------------------------------------------------------------------------------------------|---------------|--------|
| $p(y_i t_i)$                                                   | $F_i$                                                                                      | $A_i=100 F_i$ |        |
| $p(y_4 t_4) \sim R\_Date_4(t_4, r_2, s_2, 630,30)$             | $F_4 = (\int p(y_4 t_4) p(t_4 y) dt_4) / (\int p^2(y_4 t_4) dt_4)$                         | 0.86950       | 86.95  |
| $p(y_6 t_6) \sim R\_Date_6(t_6, r_2, s_2, 460,30)$             | $F_6 = (\int p(y_6 t_6) p(t_6 y) dt_6) / (\int p^2(y_6 t_6) dt_6)$                         | 1.10100       | 110.10 |
| $p(y_8 t_8) \sim R\_Date_8(t_8, r_2, s_2, 300,30)$             | $F_8 = (\int p(y_8 t_8) p(t_8 y) dt_8) / (\int p^2(y_8 t_8) dt_8)$                         | 0.57410       | 57.41  |
| $p(y_{10} t_{10}) \sim R\_Date_{10}(t_{10}, r_2, s_2, 860,30)$ | $F_{10} = (\int p(y_{10} t_{10}) p(t_{10} y) dt_{10}) / (\int p^2(y_{10} t_{10}) dt_{10})$ |               |        |
| $p(y_{12} t_{12}) \sim R\_Date_{12}(t_{12}, r_2, s_2, 340,30)$ | $F_{12} = (\int p(y_{12} t_{12}) p(t_{12} y) dt_{12}) / (\int p^2(y_{12} t_{12}) dt_{12})$ | 1.14390       | 114.39 |
| $p(y_{14} t_{14}) \sim R\_Date_{14}(t_{14}, r_2, s_2, 350,30)$ | $F_{14} = (\int p(y_{14} t_{14}) p(t_{14} y) dt_{14}) / (\int p^2(y_{14} t_{14}) dt_{14})$ | 1.11520       | 111.52 |
| $p(y_{16} t_{16}) \sim R\_Date_{16}(t_{16}, r_2, s_2, 520,30)$ | $F_{16} = (\int p(y_{16} t_{16}) p(t_{16} y) dt_{16}) / (\int p^2(y_{16} t_{16}) dt_{16})$ |               |        |
| $p(y_{18} t_{18}) \sim R\_Date_{18}(t_{18}, r_2, s_2, 360,30)$ | $F_{18} = (\int p(y_{18} t_{18}) p(t_{18} y) dt_{18}) / (\int p^2(y_{18} t_{18}) dt_{18})$ | 1.01190       | 101.19 |
| $p(y_{20} t_{20}) \sim R\_Date_{20}(t_{20}, r_2, s_2, 350,30)$ | $F_{20} = (\int p(y_{20} t_{20}) p(t_{20} y) dt_{20}) / (\int p^2(y_{20} t_{20}) dt_{20})$ | 0.93600       | 93.60  |
| $p(y_{22} t_{22}) \sim R\_Date_{22}(t_{22}, r_2, s_2, 340,30)$ | $F_{22} = (\int p(y_{22} t_{22}) p(t_{22} y) dt_{22}) / (\int p^2(y_{22} t_{22}) dt_{22})$ | 0.96630       | 96.63  |
| $p(y_{24} t_{24}) \sim R\_Date_{24}(t_{24}, r_2, s_2, 280,30)$ | $F_{24} = (\int p(y_{24} t_{24}) p(t_{24} y) dt_{24}) / (\int p^2(y_{24} t_{24}) dt_{24})$ | 1.43240       | 143.24 |
|                                                                |                                                                                            |               |        |
| <b>n</b>                                                       |                                                                                            | 9             |        |
| <b>F<sub>model</sub></b>                                       | $\int p(y t) p(t y) dt / \int p(y t) p(y t) dt$                                            | 0.903286      |        |
| <b>A<sub>model</sub></b>                                       | $100 F_{model}^{1/n}$                                                                      | 96.67         |        |
| <b>F<sub>overall</sub></b>                                     | $\prod F_i$                                                                                | 0.919076      |        |
| <b>A<sub>overall</sub></b>                                     | $100 F_{overall}^{1/n}$                                                                    | 97.23         |        |

| Constraints         |                   |                   |                     |                   |
|---------------------|-------------------|-------------------|---------------------|-------------------|
| $t_3 < t_4$         | $t_4 < t_5$       | $t_5 < t_6$       | $t_6 < t_7$         | $t_7 < t_8$       |
| $t_8 < t_9$         | $t_9 ? < t_{10}$  | $t_9 < t_{11}$    | $t_{10} ? < t_{11}$ | $t_{11} < t_{12}$ |
| $t_{12} < t_{13}$   | $t_{13} < t_{14}$ | $t_{14} < t_{15}$ | $t_{15} ? < t_{16}$ | $t_{15} < t_{17}$ |
| $t_{16} ? < t_{17}$ | $t_{17} < t_{18}$ | $t_{18} < t_{19}$ | $t_{19} < t_{20}$   | $t_{20} < t_{21}$ |
| $t_{21} < t_{22}$   | $t_{22} < t_{23}$ | $t_{23} < t_{24}$ | $t_{24} < t_{25}$   |                   |

| Prior factors                                                                                                                                                                                |
|----------------------------------------------------------------------------------------------------------------------------------------------------------------------------------------------|
| $1/\text{min}((\text{ulim}_{25} - \text{llim}_3) - (t_{25} - t_3), (t_{25} - t_3) - (\text{llim}_{25} - \text{ulim}_3), \text{ulim}_{25} - \text{llim}_{25}, \text{ulim}_3 - \text{llim}_3)$ |
| $1/(t_5 - t_3)^1$                                                                                                                                                                            |
| $1/(t_7 - t_5)^1$                                                                                                                                                                            |
| $1/(t_9 - t_7)^1$                                                                                                                                                                            |
| $1/(t_{13} - t_{11})^1$                                                                                                                                                                      |
| $1/(t_{15} - t_{13})^1$                                                                                                                                                                      |
| $1/(t_{19} - t_{17})^1$                                                                                                                                                                      |
| $1/(t_{21} - t_{19})^1$                                                                                                                                                                      |
| $1/(t_{23} - t_{21})^1$                                                                                                                                                                      |
| $1/(t_{25} - t_{23})^1$                                                                                                                                                                      |
| $1/(t_{25} - t_3)^{10}$                                                                                                                                                                      |

| Groupings used in generating above priors |                    |          |                                                                                                                                                                                |    |                          |
|-------------------------------------------|--------------------|----------|--------------------------------------------------------------------------------------------------------------------------------------------------------------------------------|----|--------------------------|
| Type                                      | b <sub>lower</sub> | type     | elements                                                                                                                                                                       | n  | b <sub>upper</sub> type  |
| Sequence                                  | t <sub>3</sub>     | Boundary | t <sub>4</sub>                                                                                                                                                                 | 1  | t <sub>5</sub> Boundary  |
| Sequence                                  | t <sub>5</sub>     | Boundary | t <sub>6</sub>                                                                                                                                                                 | 1  | t <sub>7</sub> Boundary  |
| Sequence                                  | t <sub>7</sub>     | Boundary | t <sub>8</sub>                                                                                                                                                                 | 1  | t <sub>9</sub> Boundary  |
| Sequence                                  | t <sub>9</sub>     | Boundary |                                                                                                                                                                                | 0  | t <sub>11</sub> Boundary |
| Sequence                                  | t <sub>11</sub>    | Boundary | t <sub>12</sub>                                                                                                                                                                | 1  | t <sub>13</sub> Boundary |
| Sequence                                  | t <sub>13</sub>    | Boundary | t <sub>14</sub>                                                                                                                                                                | 1  | t <sub>15</sub> Boundary |
| Sequence                                  | t <sub>15</sub>    | Boundary |                                                                                                                                                                                | 0  | t <sub>17</sub> Boundary |
| Sequence                                  | t <sub>17</sub>    | Boundary | t <sub>18</sub>                                                                                                                                                                | 1  | t <sub>19</sub> Boundary |
| Sequence                                  | t <sub>19</sub>    | Boundary | t <sub>20</sub>                                                                                                                                                                | 1  | t <sub>21</sub> Boundary |
| Sequence                                  | t <sub>21</sub>    | Boundary | t <sub>22</sub>                                                                                                                                                                | 1  | t <sub>23</sub> Boundary |
| Sequence                                  | t <sub>23</sub>    | Boundary | t <sub>24</sub>                                                                                                                                                                | 1  | t <sub>25</sub> Boundary |
| Sequence                                  | t <sub>3</sub>     | Boundary | t <sub>5</sub> , t <sub>7</sub> , t <sub>9</sub> , t <sub>11</sub> , t <sub>13</sub> , t <sub>15</sub> , t <sub>17</sub> , t <sub>19</sub> , t <sub>21</sub> , t <sub>23</sub> | 10 | t <sub>25</sub> Boundary |
