# Supplementary material
Source: publisher figshare collection journal article supplement (https://plos.figshare.com/articles/dataset/_/3912729)
Supplement: Supplementary file 1 [file 1 › S1 Table.PDF]

| Unit           | Stratum  | Find # | Class       | Rim Ø<br>(cm) | Burning    | Thickness<br>(mm) | External surface | Internal surface |
|----------------|----------|--------|-------------|---------------|------------|-------------------|------------------|------------------|
| Area A         | Floor 12 | 27     | Rim         | 18            | Reduced    | 9                 | Polished         | Polished         |
| Area A 100/104 | Floor 12 | 22     | Wall        |               | Reduced    | 5                 | Polished         | Polished         |
| Area A 100/104 | Floor 12 | 23     | Wall        |               | Reduced    | 6                 | Black burnished  | Polished         |
| Area A 100/104 | Floor 12 | 24     | Wall        |               | Reduced    | 9                 | Polished         | Polished         |
| Area A 100/104 | Floor 12 | 26     | Wall        |               | Reduced    | 4                 | Black burnished  | Black burnished  |
| Area A 100/104 | Floor 12 | 52     | Infl. point |               | Reduced    | 6                 | Polished         | Red slipped      |
| Area A 100/105 | Floor 12 | 21     | Rim         | 12            | Reduced    | 5                 | Eroded           | Eroded           |
| Area A 100/105 | Floor 12 | 24     | Wall        |               | Reduced    | 5                 | Nail impressed   | Polished         |
| Area A 100/105 | Floor 12 | 25     | Wall        |               | Partly ox. | 5                 | Polished         | Black burnished  |
| Area A 100/105 | Floor 12 | -      | Wall        |               | Reduced    | 5                 | Red slipped      | Black burnished  |
| Area A 100/105 | Floor 12 | -      | Wall        |               | Partly ox. | 6                 | Polished         | Polished         |
| Area A 100/105 | Floor 12 | -      | Wall        |               | Reduced    | 7                 | Incised          | Polished         |
| Area A 101/104 | Floor 12 | 17     | Wall        |               | Partly ox. | 10                | Eroded           | Polished         |
| Area A 101/104 | Floor 12 | -      | Wall        |               | Reduced    | 5                 | Nail impressed   | Polished         |
| Area A 101/105 | Floor 12 | 22     | Wall        |               | Reduced    | 4                 | Polished         | Polished         |
| Area A 101/105 | Floor 12 | 24     | Wall        |               | Reduced    | 8                 | Polished         | Polished         |
| Area A 101/105 | Floor 12 | 24     | Wall        |               | Reduced    | 6                 | Polished         | Polished         |
| Area A 101/105 | Floor 12 | 26     | Wall        |               | Reduced    | 5                 | Incised          | Black burnished  |
| Area A 101/105 | Floor 12 |        | Wall        |               | Reduced    | 6                 | Black burnished  | Polished         |
| Area B 100/107 | Floor 12 |        | Wall        |               | Oxyd.      | 4                 | Black burnished  | Eroded           |
| Area B 100/107 | Floor 12 | 34     | Wall        |               | Reduced    | 4                 | Polished         | Polished         |
| Area B 100/107 | Floor 12 | 35     | Wall        |               | Reduced    | 5                 | Polished         | Black burnished  |
| Area B 100/107 | Floor 12 | 36     | Wall        |               | Reduced    | 6                 | Eroded           | Eroded           |
| Area B 100/107 | Floor 12 | 40     | Wall        |               | Reduced    | 7                 | Eroded           | Polished         |
| Area B 100/107 | Floor 12 | 41     | Wall        |               | Reduced    | 6                 | Eroded           | Black burnished  |
| Area B 100/107 | Floor 12 | 49     | Wall        |               | Reduced    | 6                 | Eroded           | Eroded           |
| Area B 100/107 | Floor 12 | 51     | Wall        |               | Reduced    | 9                 | Polished         | Polished         |
| Area B 100/107 | Floor 12 | 53     | Wall        |               | Oxyd.      | 4                 | Red slipped      | Red slipped      |
| Area B 100/107 | Floor 12 | 54     | Wall        |               | Reduced    | 6                 | Polished         | Polished         |
| Area B 100/107 | Floor 12 | 56     | Wall        |               | Reduced    | 5                 | Eroded           | Eroded           |
| Area B 100/107 | Floor 12 | 57     | Wall        |               | Partly ox. | 10                | Polished         | Black burnished  |
| Area B 100/108 | Floor 12 | 22     | Wall        |               | Reduced    | 6                 | Black burnished  | Black burnished  |
| Area B 100/108 | Floor 12 | 23     | Base        |               | Reduced    | 8                 | Eroded           | Eroded           |
| Area B 100/108 | Floor 12 | 24     | Wall        |               | Reduced    | 7                 | Polished         | Polished         |
| Area B 100/108 | Floor 12 | 25     | Wall        |               | Reduced    | 5                 | Black burnished  | Black burnished  |
| Area B 100/108 | Floor 12 | 26     | Wall        |               | Reduced    | 5                 | Polished         | Polished         |
| Area B 101/107 | Floor 12 | 30     | Wall        |               | Partly ox. | 8                 | Eroded           | Eroded           |
| Area B 101/107 | Floor 12 | 31     | Wall        |               | Partly ox. | 8                 | Eroded           | Eroded           |
| Area B 101/107 | Floor 12 | 32     | Wall        |               | Reduced    | 7                 | Polished         | Black burnished  |
| Area B 101/107 | Floor 12 | 33     | Wall        |               | Partly ox. | 8                 | Eroded           | Eroded           |
| Area B 101/107 | Floor 12 | 42     | Wall        |               | Reduced    | 8                 | Black burnished  | Black burnished  |
| Area B 101/107 | Floor 12 | 44     | Wall        |               | Oxyd.      | 10                | Eroded           | Red slipped      |
| Area B 101/108 | Floor 12 | 10     | Wall        |               | Reduced    | 5                 | Black burnished  | Polished         |
| Area B 101/108 | Floor 12 | 12     | Wall        |               | Reduced    | 6                 | Eroded           | Eroded           |
| Area B 101/108 | Floor 12 | 8      | Wall        |               | Reduced    | 9                 | Eroded           | Polished         |
| Area B 101/108 | Floor 12 | 9      | Wall        |               | Partly ox. | 5                 | Polished         | Polished         |
| Area B 101/108 | Floor 12 | -      | Wall        |               | Partly ox. | 6                 | Polished         | Polished         |
| Area A 100/104 | Floor 11 | 29     | Infl. point |               | Partly ox. | 6                 | Pinched          | Polished         |

|                |          |    |             |            |         |                 |                 |          |
|----------------|----------|----|-------------|------------|---------|-----------------|-----------------|----------|
| Area A 100/104 | Floor 11 | 32 | Wall        | Reduced    | 5       | Eroded          | Eroded          |          |
| Area A 100/104 | Floor 11 | 33 | Wall        | Reduced    | 6       | Eroded          | Black burnished |          |
| Area A 100/104 | Floor 11 | 28 | Wall        | Oxyd.      | 5       | Black burnished | Black burnished |          |
| Area A 100/104 | Floor 11 | -  | Wall        | Partly ox. | 9       | Red slipped     | Black burnished |          |
| Area A 100/105 | Floor 11 | 29 | Wall        | Reduced    | 6       | Polished        | Eroded          |          |
| Area A 100/105 | Floor 11 | 33 | Wall        | Reduced    | 4       | Polished        | Polished        |          |
| Area A 101/104 | Floor 11 | 28 | Wall        | Reduced    | 6       | Eroded          | Eroded          |          |
| Area A 101/104 | Floor 11 | 20 | Wall        | Reduced    | 5       | Polished        | Polished        |          |
| Area A 101/104 | Floor 11 | 21 | Wall        | Reduced    | 5       | Red slipped     | Polished        |          |
| Area A 101/104 | Floor 11 | 22 | Wall        | Reduced    | 11      | Polished        | Polished        |          |
| Area A 101/104 | Floor 11 | 24 | Wall        | Partly ox. | 6       | Polished        | Polished        |          |
| Area A 101/105 | Floor 11 | 29 | Wall        | Reduced    | 4       | Black burnished | Polished        |          |
| Area A 101/105 | Floor 11 | 32 | Wall        | Reduced    | 5       | Eroded          | Eroded          |          |
| Area A 101/105 | Floor 11 | 33 | Infl. point | Reduced    | 9       | Polished        | Polished        |          |
| Area B 100/107 | Floor 11 | 63 | Wall        | Reduced    | 6       | Polished        | Polished        |          |
| Area B 100/107 | Floor 11 | 65 | Wall        | Reduced    | 5       | Polished        | Polished        |          |
| Area B 100/107 | Floor 11 | 60 | Wall        | Reduced    | 7       | Eroded          | Eroded          |          |
| Area B 100/107 | Floor 11 | 61 | Wall        | Reduced    | 7       | Polished        | Polished        |          |
| Area B 100/108 | Floor 11 | 30 | Wall        | Reduced    | 4       | Eroded          | Polished        |          |
| Area B 101/107 | Floor 11 | 63 | Wall        | Partly ox. | 5       | Polished        | Polished        |          |
| Area B 101/107 | Floor 11 | 8  |             | Partly ox. | 9       | Red slipped     | Polished        |          |
| Area B 101/107 | Floor 11 | 5  | Wall        | Partly ox. | 6       | Eroded          | Eroded          |          |
| Area B 101/107 | Floor 11 | 54 | Wall        | Partly ox. | 12      | Red slipped     | Black burnished |          |
| Area B 101/107 | Floor 11 | 55 | Wall        | Reduced    | 5       | Polished        | Polished        |          |
| Area B 101/107 | Floor 11 | 58 | Wall        | Partly ox. | 5       | Polished        | Polished        |          |
| Area B 101/108 | Floor 11 | 13 | Wall        | Reduced    | 10      | Polished        | Polished        |          |
| Area A 101/105 | Floor 10 | 36 | Wall        | Reduced    | 8       | Eroded          | Eroded          |          |
| Area A 101/105 | Floor 10 | 37 | Wall        | Reduced    | 7       | Polished        | Black burnished |          |
| Area B 100/108 | Floor 9  | 33 | Wall        | Reduced    | 5       | Black burnished | Black burnished |          |
| Area B 100/108 | Floor 9  | 36 | Wall        | Reduced    | 6       | Polished        | Polished        |          |
| Area B 101/107 | Floor 9  | -  | Wall        | Reduced    | 4       | Polished        | Polished        |          |
| Area B 101/108 | Floor 9  | 17 | Wall        | Reduced    | 3       | Polished        | Polished        |          |
| Area B 101/108 | Floor 9  | 18 | Wall        | Reduced    | 8       | Black burnished | Black burnished |          |
| Area A         | Floor 8  | -  | Wall        | Reduced    | 9       | Red slipped     | Black burnished |          |
| Area A         | Floor 8  | -  | Wall        | Reduced    | 5       | Polished        | Polished        |          |
| Area A         | Floor 8  | 65 | Wall        | Reduced    | 8       | Red slipped     | Black burnished |          |
| Area A         | Floor 8  | -  | Wall        | Reduced    | 4       | Polished        | Polished        |          |
| Area A         | Floor 8  | -  | Wall        | Oxyd.      | 5       | Polished        | Polished        |          |
| Area A         | Floor 8  | -  | Wall        | Reduced    | 6       | Polished        | Polished        |          |
| Area A         | Floor 8  | -  | Rim         | 12         | Reduced | 6               | Black burnished | Polished |
| Area A 100/104 | Floor 8  | 41 | Wall        | Reduced    | 5       | Black burnished | Black burnished |          |
| Area A 100/104 | Floor 8  | 43 | Wall        | Partly ox. | 5       | Stamped         | Eroded          |          |
| Area A 100/104 | Floor 8  | 48 | Rim         | 32         | Reduced | 7               | Polished        | Polished |
| Area A 100/104 | Floor 8  | 57 | Wall        | Partly ox. | 7       | Red slipped     | Eroded          |          |
| Area A 100/104 | Floor 8  | 58 | Wall        | Partly ox. | 9       | Red slipped     | Polished        |          |
| Area A 100/104 | Floor 8  | 61 | Rim         | Reduced    | 9       | Polished        | Polished        |          |
| Area A 100/105 | Floor 8  | 49 | Wall        | Reduced    | 5       | Eroded          | Eroded          |          |
| Area A 100/105 | Floor 8  | 52 | Wall        | Reduced    | 8       | Polished        | Polished        |          |
| Area A 100/105 | Floor 8  | 63 | Wall        | Reduced    | 9       | Red slipped     | Black burnished |          |
| Area A 101/105 | Floor 8  | 37 | Wall        | Partly ox. | 7       | Eroded          | Eroded          |          |

|                |         |     |             |            |         |                 |                 |
|----------------|---------|-----|-------------|------------|---------|-----------------|-----------------|
| Area A 101/105 | Floor 8 | 51  | Wall        | Reduced    | 6       | Polished        | Polished        |
| Area A 101/105 | Floor 8 | 51  | Wall        | Reduced    | 5       | Polished        | Polished        |
| Area A 101/105 | Floor 8 | 56  | Wall        | Reduced    | 7       | Black burnished | Black burnished |
| Area B 100/107 | Floor 8 | 70  | Wall        | Reduced    | 7       | Polished        | Polished        |
| Area B 101/107 | Floor 8 | 69  | Wall        | Reduced    | 5       | Polished        | Polished        |
| Area A         | Floor 7 | 77  | Wall        | Oxyd.      | 5       | Polished        | Polished        |
| Area A         | Floor 7 | 78  | Wall        | Oxyd.      | 5       | Eroded          | Black burnished |
| Area A         | Floor 7 | 81  | Infl. point | Reduced    | 6       | Polished        | Polished        |
| Area A         | Floor 7 | 83  | Wall        | Partly ox. | 7       | Red slipped     | Black burnished |
| Area A         | Floor 7 | -   | Wall        | Partly ox. | 4       | Eroded          | Black burnished |
| Area A 100/105 | Floor 7 | 84  | Wall        | Reduced    | 9       | Red slipped     | Black burnished |
| Area A 100/105 | Floor 7 | 85  | Wall        | Reduced    | 7       | Polished        | Black burnished |
| Area A 100/105 | Floor 7 | 86  | Wall        | Reduced    | 8       | Red slipped     | Polished        |
| Area A 100/105 | Floor 7 | 86  | Wall        | Oxyd.      | 5       | Black burnished | Polished        |
| Area A 100/105 | Floor 7 | 87  | Wall        | Reduced    | 6       | Polished        | Polished        |
| Area A 101/104 | Floor 7 | 67  | Wall        | Reduced    | 8       | Black burnished | Black burnished |
| Area A 101/105 | Floor 7 | 68  | Infl. point | Reduced    | 7       | Polished        | Polished        |
| Area A 101/105 | Floor 7 | 69  | Wall        | Reduced    | 6       | Polished        | Polished        |
| Area A 101/105 | Floor 7 | 88  | Wall        | Reduced    | 7       | Red slipped     | Polished        |
| Area B 100/107 | Floor 7 | 72  | Wall        | Reduced    | 6       | Polished        | Polished        |
| Area B 100/107 | Floor 7 | 73  | Wall        | Reduced    | 5       | Polished        | Polished        |
| Area B 101/107 | Floor 7 | -   | Wall        | Reduced    | 7       | Polished        | Polished        |
| Area B 101/107 | Floor 7 | 71  | Wall        | Reduced    | 6       | Polished        | Black burnished |
| Area B 101/107 | Floor 7 | 72  | Wall        | Reduced    | 5       | Polished        | Polished        |
| Area B 101/108 | Floor 7 | 22  | Wall        | Reduced    | 6       | Eroded          | Eroded          |
| Area A         | Floor 6 | -   | Wall        | Reduced    | 8       | Black burnished | Polished        |
| Area A         | Floor 6 | -   | Wall        | Reduced    | 4       | Polished        | Polished        |
| Area A         | Floor 6 | -   | Wall        | Reduced    | 4       | Black burnished | Black burnished |
| Area A 101/104 | Floor 6 | 91  | Wall        | Partly ox. | 7       | Eroded          | Eroded          |
| Area A 101/104 | Floor 6 | 91  | Infl. point | Partly ox. | 5       | Eroded          | Black burnished |
| Area B 100/108 | Floor 6 | 47  | Wall        | Oxyd.      | 10      | Eroded          | Eroded          |
| Area B 100/108 | Floor 6 | 48  | Wall        | Partly ox. | 5       | Black burnished | Black burnished |
| Area B 101/108 | Floor 6 | 25  | Wall        | Partly ox. | 10      | Red slipped     | Polished        |
| Area B 101/108 | Floor 6 | -   | Wall        | Reduced    | 5       | Eroded          | Eroded          |
| Area A         | Floor 5 | 100 | Wall        | Reduced    | 7       | Polished        | Polished        |
| Area A         | Floor 5 | 101 | Wall        | Partly ox. | 8       | Eroded          | Eroded          |
| Area A         | Floor 5 | 104 | Wall        | Partly ox. | 8       | Red slipped     | Eroded          |
| Area A         | Floor 5 | 105 | Wall        | Reduced    | 7       | Eroded          | Eroded          |
| Area A         | Floor 5 | 108 | Wall        | Oxyd.      | 9       | Red slipped     | Polished        |
| Area A         | Floor 5 | 109 | Wall        | Partly ox. | 7       | Red slipped     | Black burnished |
| Area A         | Floor 5 | 110 | Wall        | Oxyd.      | 10      | Eroded          | Eroded          |
| Area A         | Floor 5 | 111 | Wall        | Reduced    | 7       | Red slipped     | Black burnished |
| Area A         | Floor 5 | 113 | Wall        | Partly ox. | 9       | Eroded          | Red slipped     |
| Area A         | Floor 5 | 115 | Wall        | Partly ox. | 10      | Red slipped     | Black burnished |
| Area A         | Floor 5 | 116 | Wall        | Reduced    | 12      | Polished        | Polished        |
| Area A         | Floor 5 | 116 | Rim         | 20         | Reduced | 9               | Polished        |
| Area A         | Floor 5 | 117 | Wall        | Reduced    | 9       | Black burnished | Black burnished |
| Area A         | Floor 5 | 117 | Wall        | Reduced    | 9       | Black burnished | Black burnished |
| Area A         | Floor 5 | 118 | Wall        | Oxyd.      | 10      | Red slipped     | Black burnished |
| Area A         | Floor 5 | 119 | Wall        | Partly ox. | 11      | Polished        | Eroded          |

|        |         |     |             |    |            |    |                 |                 |
|--------|---------|-----|-------------|----|------------|----|-----------------|-----------------|
| Area A | Floor 5 | 120 | Wall        |    | Reduced    | 9  | Black burnished | Red slipped     |
| Area A | Floor 5 | 121 | Wall        |    | Oxyd.      | 14 | Red slipped     | Black burnished |
| Area A | Floor 5 | 122 | Wall        |    | Oxyd.      | 9  | Red slipped     | Polished        |
| Area A | Floor 5 | 123 | Wall        |    | Partly ox. | 8  | Black burnished | Black burnished |
| Area A | Floor 5 | 124 | Wall        |    | Oxyd.      | 10 | Eroded          | Black burnished |
| Area A | Floor 5 | 125 | Wall        |    | Oxyd.      | 9  | Red slipped     | Black burnished |
| Area A | Floor 5 | 126 | Wall        |    | Partly ox. | 7  | Red slipped     | Black burnished |
| Area A | Floor 5 | 127 | Wall        |    | Reduced    | 8  | Red slipped     | Black burnished |
| Area A | Floor 5 | 128 | Wall        |    | Reduced    | 7  | Red slipped     | Black burnished |
| Area A | Floor 5 | 128 | Wall        |    | Partly ox. | 11 | Red slipped     | Black burnished |
| Area A | Floor 5 | 129 | Wall        |    | Partly ox. | 8  | Red slipped     | Black burnished |
| Area A | Floor 5 | 130 | Rim         | 14 | Reduced    | 5  | Black burnished | Polished        |
| Area A | Floor 5 | 131 | Wall        |    | Reduced    | 8  | Polished        | Polished        |
| Area A | Floor 5 | 132 | Wall        |    | Reduced    | 9  | Polished        | Black burnished |
| Area A | Floor 5 | 132 | Wall        |    | Reduced    | 5  | Black burnished | Black burnished |
| Area A | Floor 5 | 133 | Wall        |    | Reduced    | 7  | Polished        | Polished        |
| Area A | Floor 5 | 135 | Wall        |    | Partly ox. | 5  | Eroded          | Polished        |
| Area A | Floor 5 | 135 | Wall        |    | Partly ox. | 12 | Red slipped     | Polished        |
| Area A | Floor 5 | 137 | Wall        |    | Partly ox. | 10 | Red slipped     | Black burnished |
| Area A | Floor 5 | 139 | Rim         | 30 | Reduced    | 8  | Polished        | Polished        |
| Area A | Floor 5 | 141 | Infl. point |    | Reduced    | 5  | Polished        | Polished        |
| Area A | Floor 5 | 142 | Rim         | 14 | Reduced    | 6  | Black burnished | Black burnished |
| Area A | Floor 5 | 143 | Wall        |    | Reduced    | 9  | Red slipped     | Black burnished |
| Area A | Floor 5 | 144 | Wall        |    | Reduced    | 9  | Polished        | Eroded          |
| Area A | Floor 5 | 145 | Rim         | 24 | Reduced    | 10 | Polished        | Polished        |
| Area A | Floor 5 | 146 | Wall        |    | Reduced    | 10 | Red slipped     | Black burnished |
| Area A | Floor 5 | 147 | Wall        |    | Reduced    | 10 | Eroded          | Polished        |
| Area A | Floor 5 | 148 | Wall        |    | Reduced    | 8  | Eroded          | Eroded          |
| Area A | Floor 5 | 149 | Wall        |    | Partly ox. | 4  | Punct.          | Black burnished |
| Area A | Floor 5 | 150 | Wall        |    | Reduced    | 11 | Red slipped     | Black burnished |
| Area A | Floor 5 | 151 | Infl. point |    | Partly ox. | 5  | Punctate        | Black burnished |
| Area A | Floor 5 | 152 | Rim         | 10 | Reduced    | 5  | Black burnished | Black burnished |
| Area A | Floor 5 | 153 | Wall        |    | Reduced    | 8  | Eroded          | Polished        |
| Area A | Floor 5 | 154 | Wall        |    | Oxyd.      | 12 | Eroded          | Black burnished |
| Area A | Floor 5 | 154 | Rim         | 14 | Reduced    | 5  | Polished        | Polished        |
| Area A | Floor 5 | 154 | Rim         | 14 | Reduced    | 5  | Eroded          | Eroded          |
| Area A | Floor 5 | 155 | Wall        |    | Reduced    | 7  | Eroded          | Eroded          |
| Area A | Floor 5 | 156 | Wall        |    | Partly ox. | 13 | Eroded          | Eroded          |
| Area A | Floor 5 | 156 | Wall        |    | Partly ox. | 8  | Eroded          | Eroded          |
| Area A | Floor 5 | 94  | Wall        |    | Partly ox. | 12 | Red slipped     | Polished        |
| Area A | Floor 5 | 95  | Rim         | 24 | Reduced    | 9  | Black burnished | Polished        |
| Area A | Floor 5 | 96  | Wall        |    | Reduced    | 13 | Red slipped     | Eroded          |
| Area A | Floor 5 | 99  | Wall        |    | Partly ox. | 5  | Eroded          | Eroded          |
| Area A | Floor 5 | 99  | Wall        |    | Reduced    | 8  | Red slipped     | Black burnished |
| Area A | Floor 5 | 99  | Wall        |    | Reduced    | 9  | Black burnished | Polished        |
| Area A | Floor 5 | 99  | Wall        |    | Oxyd.      | 9  | Eroded          | Eroded          |
| Area A | Floor 5 | 99  | Wall        |    | Partly ox. | 10 | Red slipped     | Polished        |
| Area A | Floor 5 | 99  | Wall        |    | Reduced    | 5  | Eroded          | Eroded          |
| Area A | Floor 5 | 99  | Wall        |    | Reduced    | 8  | Black burnished | Black burnished |
| Area A | Floor 5 | 99  | Rim         | 16 | Reduced    | 8  | Polished        | Polished        |

|                |         |     |             |    |            |    |                 |                 |
|----------------|---------|-----|-------------|----|------------|----|-----------------|-----------------|
| Area A         | Floor 5 | 99  | Rim         | 16 | Reduced    | 9  | Black burnished | Polished        |
| Area A         | Floor 5 | -   | Wall        |    | Reduced    | 5  | Polished        | Polished        |
| Area A         | Floor 5 | -   | Wall        |    | Reduced    | 4  | Polished        | Polished        |
| Area A         | Floor 5 | -   | Rim         | 8  | Reduced    | 5  | Polished        | Polished        |
| Area A         | Floor 5 | 84  | Wall        |    | Reduced    | 8  | Polished        | Polished        |
| Area A         | Floor 5 | 79  | Wall        |    | Reduced    | 5  | Red slipped     | Black burnished |
| Area B 100/107 | Floor 5 | 88  | Infl. point |    | Reduced    | 10 | Black burnished | Polished        |
| Area B 100/107 | Floor 5 | 91  | Wall        |    | Reduced    | 6  | Black burnished | Black burnished |
| Area B 100/107 | Floor 5 | -   | Wall        |    | Partly ox. | 7  | Eroded          | Black burnished |
| Area B 100/107 | Floor 5 | -   | Wall        |    | Reduced    | 5  | Eroded          | Eroded          |
| Area B 100/107 | Floor 5 | 80  | Wall        |    | Partly ox. | 6  | Red slipped     | Eroded          |
| Area B 100/107 | Floor 5 | -   | Wall        |    | Reduced    | 9  | Red slipped     | Black burnished |
| Area B 100/107 | Floor 5 | 100 | Wall        |    | Reduced    | 7  | Black burnished | Black burnished |
| Area B 100/108 | Floor 5 | 53  | Wall        |    | Reduced    | 9  | Black burnished | Eroded          |
| Area B 100/108 | Floor 5 | 54  | Wall        |    | Partly ox. | 8  | Red slipped     | Black burnished |
| Area B 100/108 | Floor 5 | 55  | Wall        |    | Reduced    | 10 | Red slipped     | Black burnished |
| Area B 100/108 | Floor 5 | 56  | Wall        |    | Partly ox. | 15 | Red slipped     | Black burnished |
| Area B 100/108 | Floor 5 | 57  | Wall        |    | Oxyd.      | 8  | Red slipped     | Polished        |
| Area B 100/108 | Floor 5 | 53  | Wall        |    | Reduced    | 9  | Red slipped     | Black burnished |
| Area B 100/108 | Floor 5 | 54  | Wall        |    | Reduced    | 9  | Black burnished | Polished        |
| Area B 100/108 | Floor 5 | 56  | Wall        |    | Reduced    | 10 | Polished        | Polished        |
| Area B 100/108 | Floor 5 | 57  | Wall        |    | Reduced    | 10 | Black burnished | Polished        |
| Area B 100/108 | Floor 5 | 57  | Rim         |    | Reduced    | 10 | Eroded          | Eroded          |
| Area B 100/108 | Floor 5 | 51  | Wall        |    | Reduced    | 7  | Polished        | Black burnished |
| Area B 101/107 | Floor 5 | 76  | Wall        |    | Reduced    | 5  | Black burnished | Black burnished |
| Area B 101/107 | Floor 5 | 77  | Wall        |    | Reduced    | 10 | Polished        | Polished        |
| Area B 101/107 | Floor 5 | 78  | Infl. point |    | Reduced    | 5  | Polished        | Black burnished |
| Area B 101/107 | Floor 5 | 79  | Wall        |    | Reduced    | 6  | Polished        | Black burnished |
| Area B 101/108 | Floor 5 | 34  | Wall        |    | Reduced    | 6  | Polished        | Polished        |
| Area B 101/108 | Floor 5 | 35  | Wall        |    | Reduced    | 8  | Black burnished | Black burnished |
| Area B 101/108 | Floor 5 | 36  | Infl. point |    | Reduced    | 6  | Black burnished | Polished        |
| Area B 101/108 | Floor 5 | 38  | Wall        |    | Reduced    | 6  | Black burnished | Black burnished |
| Area B 101/108 | Floor 5 | 39  | Wall        |    | Reduced    | 9  | Eroded          | Eroded          |
| Area B 101/108 | Floor 5 | 40  | Wall        |    | Reduced    | 9  | Polished        | Polished        |
| Area B 101/108 | Floor 5 | 41  | Base        |    | Reduced    | 16 | Black burnished | Black burnished |
| Area B 101/108 | Floor 5 | 43  | Wall        |    | Reduced    | 9  | Black burnished | Black burnished |
| Area B 101/108 | Floor 5 | 45  | Wall        |    | Reduced    | 9  | Polished        | Black burnished |
| Area B 101/108 | Floor 5 | 46  | Wall        |    | Reduced    | 7  | Black burnished | Black burnished |
| Area B 101/108 | Floor 5 | 47  | Wall        |    | Reduced    | 8  | Black burnished | Black burnished |
| Area B 101/108 | Floor 5 | 48  | Wall        |    | Reduced    | 9  | Black burnished | Black burnished |
| Area B 101/108 | Floor 5 | 50  | Wall        |    | Reduced    | 6  | Polished        | Red slipped     |
| Area B 101/108 | Floor 5 | 51  | Wall        |    | Reduced    | 7  | Polished        | Black burnished |
| Area B 101/108 | Floor 5 | 52  | Wall        |    | Reduced    | 8  | Polished        | Black burnished |
| Area B 101/108 | Floor 5 | 53  | Wall        |    | Reduced    | 8  | Black burnished | Polished        |
| Area A         | Floor 4 | 161 | Wall        |    | Reduced    | 5  | Black burnished | Black burnished |
| Area A         | Floor 4 | 163 | Wall        |    | Reduced    | 5  | Black burnished | Polished        |
| Area A         | Floor 4 | 164 | Wall        |    | Reduced    | 8  | Polished        | Black burnished |
| Area A         | Floor 4 | 157 | Rim         | 16 | Reduced    | 4  | Black burnished | Black burnished |
| Area A         | Floor 4 | 158 | Wall        |    | Partly ox. | 9  | Red slipped     | Polished        |
| Area A         | Floor 4 | 159 | Wall        |    | Reduced    | 9  | Black burnished | Black burnished |

|                |         |     |             |    |            |    |                 |                 |
|----------------|---------|-----|-------------|----|------------|----|-----------------|-----------------|
| Area A         | Floor 4 | 160 | Wall        |    | Reduced    | 11 | Red slipped     | Polished        |
| Area A         | Floor 4 | 168 | Wall        |    | Partly ox. | 5  | Black burnished | Black burnished |
| Area A         | Floor 4 | 169 | Wall        |    | Reduced    | 10 | Eroded          | Eroded          |
| Area A         | Floor 4 | 171 | Wall        |    | Reduced    | 5  | Polished        | Polished        |
| Area A         | Floor 4 | 172 | Wall        |    | Reduced    | 5  | Polished        | Polished        |
| Area A         | Floor 4 | 173 | Rim         | 10 | Reduced    | 5  | Polished        | Polished        |
| Area A         | Floor 4 | 174 | Wall        |    | Reduced    | 6  | Eroded          | Eroded          |
| Area A         | Floor 4 | 180 | Base        |    | Partly ox. | 6  | Red slipped     | Black burnished |
| Area A         | Floor 4 | 181 | Rim         | 12 | Reduced    | 5  | Black burnished | Black burnished |
| Area A         | Floor 4 | 186 | Infl. point |    | Reduced    | 6  | Black burnished | Black burnished |
| Area A         | Floor 4 | 187 | Wall        |    | Reduced    | 10 | Black burnished | Eroded          |
| Area A         | Floor 4 | 191 | Wall        |    | Reduced    | 6  | Polished        | Polished        |
| Area A         | Floor 4 | 192 | Wall        |    | Partly ox. | 5  | Red slipped     | Black burnished |
| Area A         | Floor 4 | 193 | Rim         | 11 | Reduced    | 4  | Black burnished | Polished        |
| Area A         | Floor 4 | 194 | Wall        |    | Partly ox. | 7  | Polished        | Polished        |
| Area A         | Floor 4 | 195 | Wall        |    | Oxyd.      | 13 | Eroded          | Eroded          |
| Area A         | Floor 4 | 196 | Wall        |    | Reduced    | 6  | Polished        | Black burnished |
| Area A         | Floor 4 | 197 | Wall        |    | Reduced    | 9  | Black burnished | Black burnished |
| Area A         | Floor 4 | 198 | Wall        |    | Partly ox. | 8  | Red slipped     | Black burnished |
| Area A         | Floor 4 | -   | Wall        |    | Reduced    | 5  | Black burnished | Black burnished |
| Area A         | Floor 4 | 190 | Wall        |    | Reduced    | 8  | Red slipped     | Polished        |
| Area A         | Floor 4 | 177 | Wall        |    | Partly ox. | 13 | Red slipped     | Eroded          |
| Area A         | Floor 4 | 178 | Wall        |    | Reduced    | 9  | Red slipped     | Polished        |
| Area A         | Floor 4 | 189 | Wall        |    | Reduced    | 7  | Black burnished | Black burnished |
| Area A         | Floor 4 | 206 | Wall        |    | Reduced    | 8  | Polished        | Black burnished |
| Area A         | Floor 4 | 211 | Wall        |    | Reduced    | 6  | Polished        | Black burnished |
| Area A         | Floor 4 | 212 | Wall        |    | Reduced    | 8  | Black burnished | Black burnished |
| Area A         | Floor 4 | 213 | Wall        |    | Reduced    | 5  | Eroded          | Eroded          |
| Area A         | Floor 4 | 207 | Wall        |    | Reduced    | 8  | Polished        | Black burnished |
| Area A         | Floor 4 | 214 | Wall        |    | Reduced    | 7  | Polished        | Polished        |
| Area A         | Floor 4 | 216 | Wall        |    | Reduced    | 5  | Polished        | Black burnished |
| Area A         | Floor 4 | 218 | Rim         | 20 | Oxyd.      | 7  | Black burnished | Black burnished |
| Area A         | Floor 4 | 219 | Wall        |    | Reduced    | 6  | Polished        | Black burnished |
| Area A         | Floor 4 | 209 | Wall        |    | Reduced    | 6  | Black burnished | Polished        |
| Area A         | Floor 4 | 209 | Wall        |    | Oxyd.      | 6  | Red slipped     | Black burnished |
| Area A         | Floor 4 | 209 | Infl. point |    | Reduced    | 6  | Black burnished | Black burnished |
| Area A         | Floor 4 | 210 | Wall        |    | Reduced    | 6  | Eroded          | Black burnished |
| Area A         | Floor 4 | 179 | Wall        |    | Reduced    | 5  | Black burnished | Black burnished |
| Area A         | Floor 4 | 179 | Wall        |    | Reduced    | 6  | Black burnished | Black burnished |
| Area A         | Floor 4 | 208 | Wall        |    | Reduced    | 9  | Black burnished | Black burnished |
| Area B         | Floor 4 | 92  | Infl. point |    | Reduced    | 8  | Polished        | Black burnished |
| Area B         | Floor 4 | -   | Wall        |    | Reduced    | 5  | Black burnished | Black burnished |
| Area B 100/107 | Floor 4 | 98  | Wall        |    | Reduced    | 6  | Eroded          | Eroded          |
| Area B 100/107 | Floor 4 | 99  | Wall        |    | Reduced    | 6  | Eroded          | Eroded          |
| Area B 100/107 | Floor 4 | 97  | Wall        |    | Reduced    | 5  | Eroded          | Eroded          |
| Area B 100/107 | Floor 4 | 101 | Wall        |    | Reduced    | 9  | Polished        | Polished        |
| Area B 100/107 | Floor 4 | 102 | Wall        |    | Reduced    | 6  | Black burnished | Black burnished |
| Area B 100/107 | Floor 4 | 103 | Wall        |    | Partly ox. | 16 | Red slipped     | Eroded          |
| Area B 100/107 | Floor 4 | 108 | Wall        |    | Reduced    | 4  | Black burnished | Black burnished |
| Area B 100/107 | Floor 4 | -   | Wall        |    | Reduced    | 5  | Polished        | Black burnished |

|                |         |     |             |            |         |                        |                 |          |
|----------------|---------|-----|-------------|------------|---------|------------------------|-----------------|----------|
| Area B 100/107 | Floor 4 | 106 | Base        | Reduced    | 4       | Black burnished        | Black burnished |          |
| Area B 100/107 | Floor 4 | 111 | Infl. point | Reduced    | 4       | Black burnished        | Black burnished |          |
| Area B 100/107 | Floor 4 | 87  | Base        | Reduced    | 4       | Black burnished        | Black burnished |          |
| Area B 100/108 | Floor 4 | 58  | Wall        | Reduced    | 5       | Eroded                 | Eroded          |          |
| Area B 100/108 | Floor 4 | 59  | Wall        | Reduced    | 8       | Polished               | Polished        |          |
| Area B 100/108 | Floor 4 | 60  | Wall        | Reduced    | 7       | Red slipped            | Black burnished |          |
| Area B 100/108 | Floor 4 | 61  | Wall        | Reduced    | 6       | Polished               | Polished        |          |
| Area B 100/108 | Floor 4 | 62  | Wall        | Reduced    | 5       | Black burnished        | Black burnished |          |
| Area B 100/108 | Floor 4 | 63  | Wall        | Reduced    | 6       | Black burnished        | Eroded          |          |
| Area B 100/108 | Floor 4 | 64  | Wall        | Reduced    | 7       | Black burnished        | Black burnished |          |
| Area B 100/108 | Floor 4 | 65  | Wall        | Reduced    | 8       | Black burnished        | Black burnished |          |
| Area B 100/108 | Floor 4 | -   | Wall        | Reduced    | 4       | Black burnished        | Black burnished |          |
| Area B 100/108 | Floor 4 | 66  | Wall        | Reduced    | 8       | Black burnished        | Black burnished |          |
| Area B 100/108 | Floor 4 | 67  | Wall        | Reduced    | 8       | Eroded                 | Polished        |          |
| Area B 101/107 | Floor 4 | 82  | Wall        | Partly ox. | 8       | Red slipped            | Black burnished |          |
| Area B 101/107 | Floor 4 | 82  | Wall        | Reduced    | 10      | Polished               | Polished        |          |
| Area B 101/107 | Floor 4 | 83  | Wall        | Reduced    | 7       | Black burnished        | Black burnished |          |
| Area B 101/107 | Floor 4 | 84  | Wall        | Reduced    | 6       | Nail impressed op. dir | Black burnished |          |
| Area B 101/107 | Floor 4 | 89  | Wall        | Reduced    | 7       | Pinched                | Black burnished |          |
| Area B 101/107 | Floor 4 | 97  | Wall        | Reduced    | 6       | Black burnished        | Black burnished |          |
| Area B 101/107 | Floor 4 | 100 | Wall        | Reduced    | 7       | Incised                | Eroded          |          |
| Area B 101/108 | Floor 4 | 55  | Wall        | Reduced    | 14      | Red slipped            | Black burnished |          |
| Area B 101/108 | Floor 4 | 57  | Wall        | Reduced    | 5       | Black burnished        | Polished        |          |
| Area B 101/108 | Floor 4 | 58  | Wall        | Reduced    | 6       | Red slipped            | Black burnished |          |
| Area A         | Floor 3 | 200 | Wall        | Oxyd.      | 8       | Eroded                 | Eroded          |          |
| Area A         | Floor 3 | 201 | Wall        | Oxyd.      | 6       | Polished               | Eroded          |          |
| Area A         | Floor 3 | 202 | Wall        | Reduced    | 4       | Black burnished        | Black burnished |          |
| Area A         | Floor 3 | 204 | Wall        | Reduced    | 5       | Black burnished        | Polished        |          |
| Area A         | Floor 3 | 220 | Infl. point | Reduced    | 4       | Incised                | Polished        |          |
| Area A         | Floor 3 | 221 | Rim         | 5          | Reduced | 4                      | Nail impressed  | Eroded   |
| Area A         | Floor 3 | 222 | Base        | Reduced    | 8       | Black burnished        | Black burnished |          |
| Area A         | Floor 3 | 223 | Rim         | 12         | Reduced | 4                      | Black burnished | Polished |
| Area A         | Floor 3 | 224 | Wall        | Reduced    | 8       | Red slipped            | Black burnished |          |
| Area A         | Floor 3 | 224 | Rim         | Reduced    | 6       | Black burnished        | Black burnished |          |
| Area A         | Floor 3 | 226 | Rim         | 19         | Reduced | 6                      | Polished        | Polished |
| Area A         | Floor 3 | 228 | Rim         | Reduced    | 7       | Eroded                 | Eroded          |          |
| Area A         | Floor 3 | 230 | Infl. point | Reduced    | 7       | Black burnished        | Black burnished |          |
| Area A         | Floor 3 | 231 | Wall        | Reduced    | 13      | Polished               | Black burnished |          |
| Area A         | Floor 3 | 233 | Wall        | Oxyd.      | 12      | Eroded                 | Eroded          |          |
| Area A         | Floor 3 | 233 | Rim         | 10         | Reduced | 5                      | Eroded          | Polished |
| Area A         | Floor 3 | 235 | Rim         | 15         | Reduced | 5                      | Black burnished | Eroded   |
| Area A         | Floor 3 | 236 | Wall        | Reduced    | 7       | Polished               | Black burnished |          |
| Area A         | Floor 3 | 237 | Wall        | Reduced    | 5       | Polished               | Black burnished |          |
| Area A         | Floor 3 | 238 | Wall        | Partly ox. | 10      | Red slipped            | Black burnished |          |
| Area A         | Floor 3 | 239 | Wall        | Reduced    | 13      | Polished               | Black burnished |          |
| Area A         | Floor 3 | 239 | Wall        | Reduced    | 9       | Red slipped            | Polished        |          |
| Area A         | Floor 3 | 241 | Rim         | 28         | Reduced | 9                      | Black burnished | Eroded   |
| Area A         | Floor 3 | 245 | Wall        | Reduced    | 7       | Polished               | Polished        |          |
| Area A         | Floor 3 | 251 | Wall        | Partly ox. | 8       | Red slipped            | Black burnished |          |
| Area A         | Floor 3 | 253 | Wall        | Reduced    | 15      | Black burnished        | Polished        |          |

|        |         |     |             |    |            |    |                 |                 |
|--------|---------|-----|-------------|----|------------|----|-----------------|-----------------|
| Area A | Floor 3 | 254 | Wall        |    | Reduced    | 8  | Black burnished | Polished        |
| Area A | Floor 3 | 255 | Infl. point |    | Reduced    | 6  | Black burnished | Black burnished |
| Area A | Floor 3 | 255 | Rim         | 28 | Reduced    | 9  | Black burnished | Polished        |
| Area A | Floor 3 | 256 | Wall        |    | Reduced    | 5  | Incised         | Black burnished |
| Area A | Floor 3 | 257 | Wall        |    | Partly ox. | 12 | Red slipped     | Polished        |
| Area A | Floor 3 | -   | Wall        |    | Reduced    | 8  | Polished        | Polished        |
| Area A | Floor 3 | -   | Wall        |    | Partly ox. | 13 | Eroded          | Eroded          |
| Area A | Floor 3 | -   | Wall        |    | Partly ox. | 7  | Polished        | Black burnished |
| Area A | Floor 3 | -   | Wall        |    | Reduced    | 12 | Black burnished | Polished        |
| Area A | Floor 3 | -   | Rim         | 26 | Oxyd.      | 9  | Red slipped     | Red slipped     |
| Area A | Floor 3 | -   | Wall        |    | Reduced    | 3  | Punct.          | Polished        |
| Area A | Floor 3 | 199 | Rim         | 20 | Reduced    | 9  | Polished        | Polished        |
| Area A | Floor 3 | -   | Wall        |    | Reduced    | 7  | Black burnished | Black burnished |
| Area A | Floor 3 | -   | Wall        |    | Reduced    | 7  | Polished        | Black burnished |
| Area A | Floor 3 | 226 | Rim         | 20 | Partly ox. | 5  | Black burnished | Polished        |
| Area A | Floor 3 | 240 | Wall        |    | Reduced    | 5  | Polished        | Polished        |
| Area B | Floor 3 | 203 | Wall        |    | Oxyd.      | 9  | Red slipped     | Eroded          |
| Area B | Floor 3 | 207 | Wall        |    | Reduced    | 7  | Black burnished | Eroded          |
| Area B | Floor 3 | 208 | Wall        |    | Partly ox. | 5  | Incised         | Eroded          |
| Area B | Floor 3 | 209 | Wall        |    | Partly ox. | 5  | Polished        | Eroded          |
| Area B | Floor 3 | 210 | Wall        |    | Reduced    | 10 | Red slipped     | Eroded          |
| Area B | Floor 3 | 212 | Wall        |    | Reduced    | 9  | Black burnished | Eroded          |
| Area B | Floor 3 | 214 | Wall        |    | Partly ox. | 9  | Red slipped     | Eroded          |
| Area B | Floor 3 | 218 | Wall        |    | Reduced    | 9  | Polished        | Eroded          |
| Area B | Floor 3 | 219 | Wall        |    | Partly ox. | 10 | Red slipped     | Eroded          |
| Area B | Floor 3 | 223 | Wall        |    | Reduced    | 6  | Polished        | Eroded          |
| Area B | Floor 3 | 224 | Rim         | 24 | Reduced    | 5  | Incised         | Eroded          |
| Area B | Floor 3 | 225 | Wall        |    | Reduced    | 5  | Stamped         | Eroded          |
| Area B | Floor 3 | 226 | Wall        |    | Reduced    | 11 | Red slipped     | Eroded          |
| Area B | Floor 3 | 227 | Wall        |    | Reduced    | 6  | Red slipped     | Eroded          |
| Area B | Floor 3 | 235 | Wall        |    | Partly ox. | 8  | Red slipped     | Eroded          |
| Area B | Floor 3 | 236 | Wall        |    | Reduced    | 6  | Polished        | Eroded          |
| Area B | Floor 3 | 239 | Wall        |    | Reduced    | 9  | Eroded          | Eroded          |
| Area B | Floor 3 | 240 | Wall        |    | Reduced    | 5  | Black burnished | Eroded          |
| Area B | Floor 3 | 241 | Wall        |    | Oxyd.      | 8  | Red slipped     | Eroded          |
| Area B | Floor 3 | 242 | Rim         |    | Reduced    | 7  | Black burnished | Eroded          |
| Area B | Floor 3 | 242 | Infl. point |    | Reduced    | 4  | Black burnished | Eroded          |
| Area B | Floor 3 | 243 | Wall        |    | Reduced    | 5  | Stamped         | Eroded          |
| Area B | Floor 3 | 244 | Wall        |    | Reduced    | 7  | Polished        | Eroded          |
| Area B | Floor 3 | 245 | Wall        |    | Reduced    | 9  | Red slipped     | Eroded          |
| Area A | Floor 2 | 258 | Wall        |    | Reduced    | 5  | Polished        | Black burnished |
| Area A | Floor 2 | 259 | Rim         | 30 | Reduced    | 11 | Black burnished | Black burnished |
| Area A | Floor 2 | 259 | Rim         |    | Reduced    | 5  | Polished        | Polished        |
| Area B | Floor 2 | 249 | Wall        |    | Reduced    | 11 | Polished        | Black burnished |
| Area B | Floor 2 | 250 | Wall        |    | Reduced    | 8  | Eroded          | Eroded          |
| Area B | Floor 2 | 254 | Wall        |    | Partly ox. | 11 | Eroded          | Black burnished |
| Area B | Floor 2 | 269 | Wall        |    | Reduced    | 9  | Polished        | Black burnished |
| Area B | Floor 2 | 270 | Wall        |    | Reduced    | 4  | Pinched         | Black burnished |
| Area B | Floor 2 | 274 | Wall        |    | Partly ox. | 9  | Red slipped     | Black burnished |
| Area B | Floor 2 | 279 | Wall        |    | Partly ox. | 15 | Red slipped     | Black burnished |

|                |         |     |             |            |    |                 |                 |
|----------------|---------|-----|-------------|------------|----|-----------------|-----------------|
| Area B         | Floor 2 | 279 | Wall        | Partly ox. | 15 | Red slipped     | Black burnished |
| Area B         | Floor 2 | 279 | Wall        | Partly ox. | 15 | Red slipped     | Black burnished |
| Area B         | Floor 2 | 279 | Wall        | Partly ox. | 15 | Red slipped     | Black burnished |
| Area B         | Floor 2 | 279 | Wall        | Partly ox. | 15 | Red slipped     | Black burnished |
| Area B         | Floor 2 | 279 | Wall        | Partly ox. | 15 | Red slipped     | Black burnished |
| Area B         | Floor 2 | 279 | Wall        | Partly ox. | 15 | Red slipped     | Black burnished |
| Area B         | Floor 2 | 279 | Wall        | Partly ox. | 15 | Red slipped     | Black burnished |
| Area B         | Floor 2 | 279 | Wall        | Partly ox. | 15 | Red slipped     | Black burnished |
| Area B         | Floor 2 | 279 | Wall        | Partly ox. | 15 | Red slipped     | Black burnished |
| Area B         | Floor 2 | 279 | Wall        | Partly ox. | 15 | Red slipped     | Black burnished |
| Area B         | Floor 2 | 279 | Wall        | Partly ox. | 15 | Red slipped     | Black burnished |
| Area B         | Floor 2 | 279 | Wall        | Partly ox. | 15 | Red slipped     | Black burnished |
| Area B         | Floor 2 | 280 | Wall        | Reduced    | 12 | Black burnished | Black burnished |
| Area B         | Floor 2 | 281 | Wall        | Reduced    | 11 | Polished        | Polished        |
| Area B 101/107 | Floor 2 | 246 | Wall        | Partly ox. | 11 | Red slipped     | Black burnished |
| Area B 101/107 | Floor 2 | 247 | Wall        | Reduced    | 10 | Black burnished | Black burnished |
| Area B 101/107 | Floor 2 | 248 | Rim         | Reduced    | 6  | Black burnished | Black burnished |
| Area A         | Floor 1 | 260 | Wall        | Reduced    | 8  | Stamped         | Black burnished |
| Area A         | Floor 1 | 263 | Wall        | Partly ox. | 5  | Polished        | Black burnished |
| Area A         | Floor 1 | 264 | Wall        | Partly ox. | 7  | Polished        | Black burnished |
| Area A         | Floor 1 | -   | Wall        | Reduced    | 7  | Punct.          | Black burnished |
| Area B         | Floor 1 | 300 | Wall        | Reduced    | 6  | Eroded          | Eroded          |
| Area B         | Floor 1 | 301 | Wall        | Partly ox. | 8  | Eroded          | Eroded          |
| Area B         | Floor 1 | 302 | Base        | Reduced    | 5  | Black burnished | Eroded          |
| Area B         | Floor 1 | 303 | Infl. point | Reduced    | 8  | Black burnished | Black burnished |
| Area B         | Floor 1 | 304 | Wall        | Reduced    | 6  | Black burnished | Black burnished |
| Area B         | Floor 1 | 305 | Wall        | Reduced    | 10 | Eroded          | Black burnished |
| Area B         | Floor 1 | 306 | Wall        | Reduced    | 7  | Polished        | Black burnished |
| Area B         | Floor 1 | 311 | Wall        | Reduced    | 6  | Black burnished | Black burnished |
| Area B         | Floor 1 | 313 | Wall        | Reduced    | 7  | Stamped         | Black burnished |
| Area B         | Floor 1 | 314 | Wall        | Reduced    | 5  | Eroded          | Black burnished |
| Area B         | Floor 1 | 315 | Wall        | Reduced    | 7  | Polished        | Black burnished |
| Area B         | Floor 1 | 316 | Wall        | Reduced    | 5  | Eroded          | Black burnished |
