# Supplementary material
Source: publisher figshare collection journal article supplement (https://plos.figshare.com/articles/dataset/_/3912729)
Supplement: Supplementary file 1 [file 1 › S2 Table.PDF]

| Stratum  | Ceramic types |     |           |
|----------|---------------|-----|-----------|
|          | Plain         | Red | Decorated |
| Floor 12 | 27            | 2   | 4         |
| Floor 11 | 16            | 4   | 0         |
| Floor 10 | 1             | 0   | 0         |
| Floor 9  | 5             | 0   | 0         |
| Floor 8  | 14            | 5   | 1         |
| Floor 7  | 13            | 4   | 0         |
| Floor 6  | 4             | 1   | 0         |
| Floor 5  | 56            | 31  | 2         |
| Floor 4  | 53            | 14  | 3         |
| Floor 3  | 37            | 15  | 8         |
| Floor 2  | 9             | 15  | 1         |
| Floor 1  | 8             | 0   | 3         |
