# Supplementary material
Source: publisher figshare collection journal article supplement (https://plos.figshare.com/articles/dataset/_/3912729)
Supplement: Supplementary file 1 [file 1 › S3 Table.PDF]

| Ceramic types | Burning atmosphere |                       |          | Thickness (mm) |      |       | Use wear           |            |
|---------------|--------------------|-----------------------|----------|----------------|------|-------|--------------------|------------|
|               | Reduced            | Incompletely oxidised | Oxidised | 3-5            | 6-10 | 11-16 | Carbonised residue | No residue |
| Plain         | 312                | 30                    | 12       | 115            | 226  | 13    | 25                 | 328        |
| Red           | 39                 | 56                    | 14       | 7              | 73   | 29    | 44                 | 65         |
| Decorated     | 26                 | 7                     | 0        | 23             | 10   | 0     | 0                  | 33         |
