# Supplementary material
Source: publisher figshare collection journal article supplement (https://plos.figshare.com/articles/dataset/_/3912729)
Supplement: Supplementary file 1 [file 1 › S4 Table.PDF]

| Unit           | Find # | Stratum  | Type    | Raw material | Modif.   | Dimensions (cm)    |
|----------------|--------|----------|---------|--------------|----------|--------------------|
| Area A 100/104 | 20     | Floor 12 | Flake   | Quartz       |          | 1.6 x 1.6          |
| Area A 101/104 | 16     | Floor 12 | Flake   | Quartz       | Retouch  | 3 x 1.4            |
| Area A 101/104 | 18     | Floor 12 | Core    | Basalt       |          | 12.3 x 13.4 x 10.2 |
| Area B 100/107 | 38     | Floor 12 | Debris  | Chert        |          |                    |
| Area B 100/107 | 39     | Floor 12 | Flake   | Quartz       |          | 1 x 0.9            |
| Area B 100/107 | 55     | Floor 12 | Flake   | Chert        |          | 4.4 x 2.7          |
| Area B 100/107 | -      | Floor 12 | Flake   | Quartz       |          | 1.1 x 0.9          |
| Area B 100/108 | 19     | Floor 12 | Flake   | Chert        | Use wear | 2.2 x 2            |
| Area B 100/108 | 21     | Floor 12 | Flake   | Chert        |          | 2 x 2              |
| Area B 101/107 | 28     | Floor 12 | Flake   | Chert        |          | 2.6 x 1.5          |
| Area B 101/107 | 36     | Floor 12 | Uniface | Basalt       | Retouch  | 8 x 7.9 x 4.2      |
| Area B 101/107 | 39     | Floor 12 | Debris  | Basalt       |          |                    |
| Area B 101/107 | 46     | Floor 12 | Flake   | Basalt       |          | 9.8 x 7            |
| Area A 100/104 | 30     | Floor 11 | Flake   | Basalt       |          | 4.5 x 4            |
| Area A 100/105 | 28     | Floor 11 | Flake   | Quartz       |          | 1.4 x 0.7          |
| Area A 100/105 | 30     | Floor 11 | Flake   | Chert        |          | 2.6 x 2.6          |
| Area A 101/104 | 29     | Floor 11 | Flake   | Basalt       | Retouch  | 7.3 x 5.1          |
| Area B 101/107 | 51     | Floor 11 | Flake   | Quartz       | Use wear | 2 x 1.2            |
| Area B 101/107 | -      | Floor 11 | Debris  | Quartz       |          |                    |
| Area A 101/105 | -      | Floor 10 | Debris  | Quartz       |          |                    |
| Area A 100/104 | 42     | Floor 9  | Flake   | Chert        |          | 2.3 x 1.9          |
| Area A 100/105 | 64     | Floor 8  | Flake   | Basalt       | Use wear | 8.1 x 7.7          |
| Area B 100/107 | 71     | Floor 8  | Flake   | Basalt       |          | 3 x 3.2            |
| Area A 101/105 | 80     | Floor 8  | Flake   | Quartz       |          | 3.2 x 1.6          |
| Area A         | 55     | Floor 8  | Flake   | Quartz       | Use wear | 3 x 1.9            |
| Area A         | 60     | Floor 8  | Flake   | Basalt       | Retouch  | 6.7 x 4.2          |
| Area A         | -      | Floor 8  | Flake   | Chert        | Retouch  | 3.5 x 2.9          |
| Area A         | -      | Floor 8  | Flake   | Chert        |          | 2 x 1              |
| Area B 101/107 | 70     | Floor 7  | Flake   | Quartz       | Use wear | 3.1 x 1.3          |
| Area A         | 66     | Floor 7  | Flake   | Quartz       |          | 1.4 x 1.3          |
| Area A         | 74     | Floor 7  | Flake   | Quartz       | Retouch  | 2.1 x 1.2          |
| Area A         | 76     | Floor 7  | Debris  | Chert        |          |                    |
| Area A         | 82     | Floor 7  | Flake   | Basalt       | Retouch  | 8.1 x 6.6          |
| Area A         | -      | Floor 7  | Flake   | Quartz       |          | 1.9 x 1.3          |
| Area A         | -      | Floor 7  | Flake   | Chert        |          | 2.2 x 1.5          |
| Area A         | -      | Floor 7  | Flake   | Basalt       |          | 4.6 x 4.8          |
| Area B 100/108 | 50     | Floor 6  | Core    | Basalt       |          | 12.2 x 9.2 x 7.1   |
| Area A         | 103    | Floor 5  | Flake   | Basalt       |          | 7.3 x 5.2          |
| Area A         | 114    | Floor 5  | Flake   | Basalt       |          | 4.8 x 4.5          |
| Area A         | 138    | Floor 5  | Flake   | Basalt       |          | 7.8 x 5.5          |
| Area A         | 140    | Floor 5  | Debris  | Chert        |          |                    |
| Area B 100/107 | 79     | Floor 5  | Flake   | Quartz       |          | 1.8 x 1            |
| Area B 101/108 | 30     | Floor 5  | Flake   | Quartz       |          | 1.7 x 2.3          |
| Area A         | 167    | Floor 5  | Flake   | Basalt       |          | 8.6 x 8            |
| Area A         | -      | Floor 5  | Flake   | Basalt       |          | 2.3 x 4.3          |
| Area A         | 93     | Floor 5  | Core    | Quartz       |          | 1 x 1.5 x 2.5      |
| Area A 100/104 | 92     | Floor 5  | Debris  | Quartz       |          |                    |
| Area B 100/107 | 96     | Floor 4  | Flake   | Basalt       |          | 6.2 x 4.9          |
| Area B 100/107 | -      | Floor 4  | Flake   | Basalt       |          | 6.4 x 3.4          |

|                |     |         |        |        |          |                   |
|----------------|-----|---------|--------|--------|----------|-------------------|
| Area B 100/107 | 107 | Floor 4 | Core   | Basalt |          | 13.2 x 8 x 8.4    |
| Area B 100/107 | 110 | Floor 4 | Debris | Chert  |          |                   |
| Area B         | 88  | Floor 4 | Core   | Basalt |          | 15.7 x 15.7 x 9.5 |
| Area B 101/108 | 56  | Floor 4 | Flake  | Basalt |          | 4.1 x 4.5         |
| Area A         | 88  | Floor 4 | Flake  | Basalt | Retouch  | 6.9 x 6           |
| Area A         | 8   | Floor 4 | Debris | Basalt |          |                   |
| Area A         | 17  | Floor 4 | Flake  | Basalt | Use wear | 5 x 3             |
| Area A         | 17  | Floor 4 | Flake  | Basalt |          | 1.5 x 3.2         |
| Area A         | 17  | Floor 4 | Flake  | Chert  |          | 1.6 x 1.9         |
| Area B 100/107 | 94  | Floor 4 | Core   | Chert  |          | 4.4 x 3.3 x 2.2   |
| Area B 100/107 | -   | Floor 4 | Flake  | Chert  | Use wear | 3.5 x 1.3         |
| Area B         | 202 | Floor 3 | Flake  | Chert  | Use wear | 4.5 x 3.5         |
| Area B         | 216 | Floor 3 | Flake  | Basalt |          | 8.7 x 5.8         |
| Area B         | 217 | Floor 3 | Flake  | Basalt |          | 8.9 x 7.1         |
| Area B         | 238 | Floor 3 | Biface | Basalt |          | 13.2 x 7.5 x 4.4  |
| Area A         | 232 | Floor 3 | Flake  | Basalt |          | 4.3 x 3.3         |
| Area A         | 226 | Floor 3 | Flake  | Basalt |          | 2.9 x 5.3         |
| Area A         | 243 | Floor 3 | Column | Basalt | Retouch  | 18 x 5.7 x 4.5    |
| Area A         | 244 | Floor 3 | Column | Basalt | Retouch  | 6.9 x 3 x 2       |
| Area B         | 271 | Floor 2 | Flake  | Basalt |          | 7.6 x 10.7        |
| Area A         | 261 | Floor 1 | Basalt | Flake  |          | 3.4 x 2.5         |
| Area A         | 261 | Floor 1 | Basalt | Debris |          |                   |
| Area A         | -   | Floor 1 | Quartz | Flake  |          | 1.5 x 1.6         |
