# Supplementary material
Source: publisher figshare collection journal article supplement (https://plos.figshare.com/articles/dataset/_/3912729)
Supplement: Supplementary file 1 [file 1 › S5 Table.PDF]

| Stratum  | Technological types |       |                            |                             |
|----------|---------------------|-------|----------------------------|-----------------------------|
|          | Flakes              | Cores | Bifacial / unifacial tools | Utilised / retouched flakes |
| Floor 12 | 7                   | 1     | 1                          | 2                           |
| Floor 11 | 3                   | 0     | 0                          | 2                           |
| Floor 10 | 0                   | 0     | 0                          | 0                           |
| Floor 9  | 1                   | 0     | 0                          | 0                           |
| Floor 8  | 3                   | 0     | 0                          | 4                           |
| Floor 7  | 4                   | 0     | 0                          | 3                           |
| Floor 6  | 0                   | 1     | 0                          | 0                           |
| Floor 5  | 7                   | 1     | 0                          | 0                           |
| Floor 4  | 5                   | 3     | 0                          | 3                           |
| Floor 3  | 4                   | 0     | 3                          | 1                           |
| Floor 2  | 1                   | 0     | 0                          | 0                           |
| Floor 1  | 2                   | 0     | 0                          | 0                           |
