# Supplementary material
Source: publisher figshare collection journal article supplement (https://plos.figshare.com/articles/dataset/_/3912729)
Supplement: Supplementary file 1 [file 1 › S6 Table.PDF]

| Stratum  | Raw material |        |       |
|----------|--------------|--------|-------|
|          | Basalt       | Quartz | Chert |
| Floor 12 | 3            | 4      | 5     |
| Floor 11 | 2            | 3      | 1     |
| Floor 10 | 0            | 1      | 0     |
| Floor 9  | 0            | 0      | 1     |
| Floor 8  | 3            | 2      | 2     |
| Floor 7  | 2            | 4      | 2     |
| Floor 6  | 1            | 0      | 0     |
| Floor 5  | 5            | 4      | 1     |
| Floor 4  | 9            | 0      | 4     |
| Floor 3  | 7            | 0      | 1     |
| Floor 2  | 1            | 0      | 0     |
| Floor 1  | 2            | 1      | 0     |
